## Addendum: Effectiveness of radiotherapy for local control in T3N0 rectal cancer managed with total mesorectal excision: a meta-analysis

Michael Jonathan Kucharczyk<sup>1,2</sup>, Andrew Bang<sup>3</sup>, Michael C. Tjong<sup>4</sup>, Stefania Papatheodorou<sup>5</sup> and Jesus C. Fabregas<sup>6</sup>

<sup>1</sup>Department of Radiation Oncology, Nova Scotia Cancer Centre, Halifax, NS B3H 1V7, Canada

<sup>2</sup>Department of Radiation Oncology, Dalhousie University, Halifax, NS B3H 1V7, Canada

<sup>3</sup>Department of Surgery, BC Cancer – Vancouver, Vancouver, BC V5Z 4E6, Canada

<sup>4</sup>Department of Radiation Oncology, Princess Margaret Cancer Centre, Toronto, ON M5T 1W6, Canada

<sup>5</sup>Department of Epidemiology, Harvard T.H. Chan School of Public Health, Boston, MA 02115, USA

<sup>6</sup>Department of Medicine, University of Florida Health Cancer Center, Gainesville, FL 32610, USA

**Published:** August 30, 2023

**Copyright:** © 2023 Kucharczyk et al. This is an open access article distributed under the terms of the [Creative Commons Attribution License](#) (CC BY 3.0), which permits unrestricted use, distribution, and reproduction in any medium, provided the original author and source are credited.

**This article has an addendum:** No external funding was obtained.

Original article: Oncotarget. 2022; 13:1109–1119. <https://doi.org/10.18632/oncotarget.28280>
